# Supplementary material for: Ternary and binary deep eutectic solvents as a novel extraction medium for protein partitioning
Source: Royal Society of Chemistry journal article supplement (doi:10.1039/c6ay01860b), 2016-01-01
Supplement: c6ay01860b1.pdf [file c6ay01860b1.pdf]

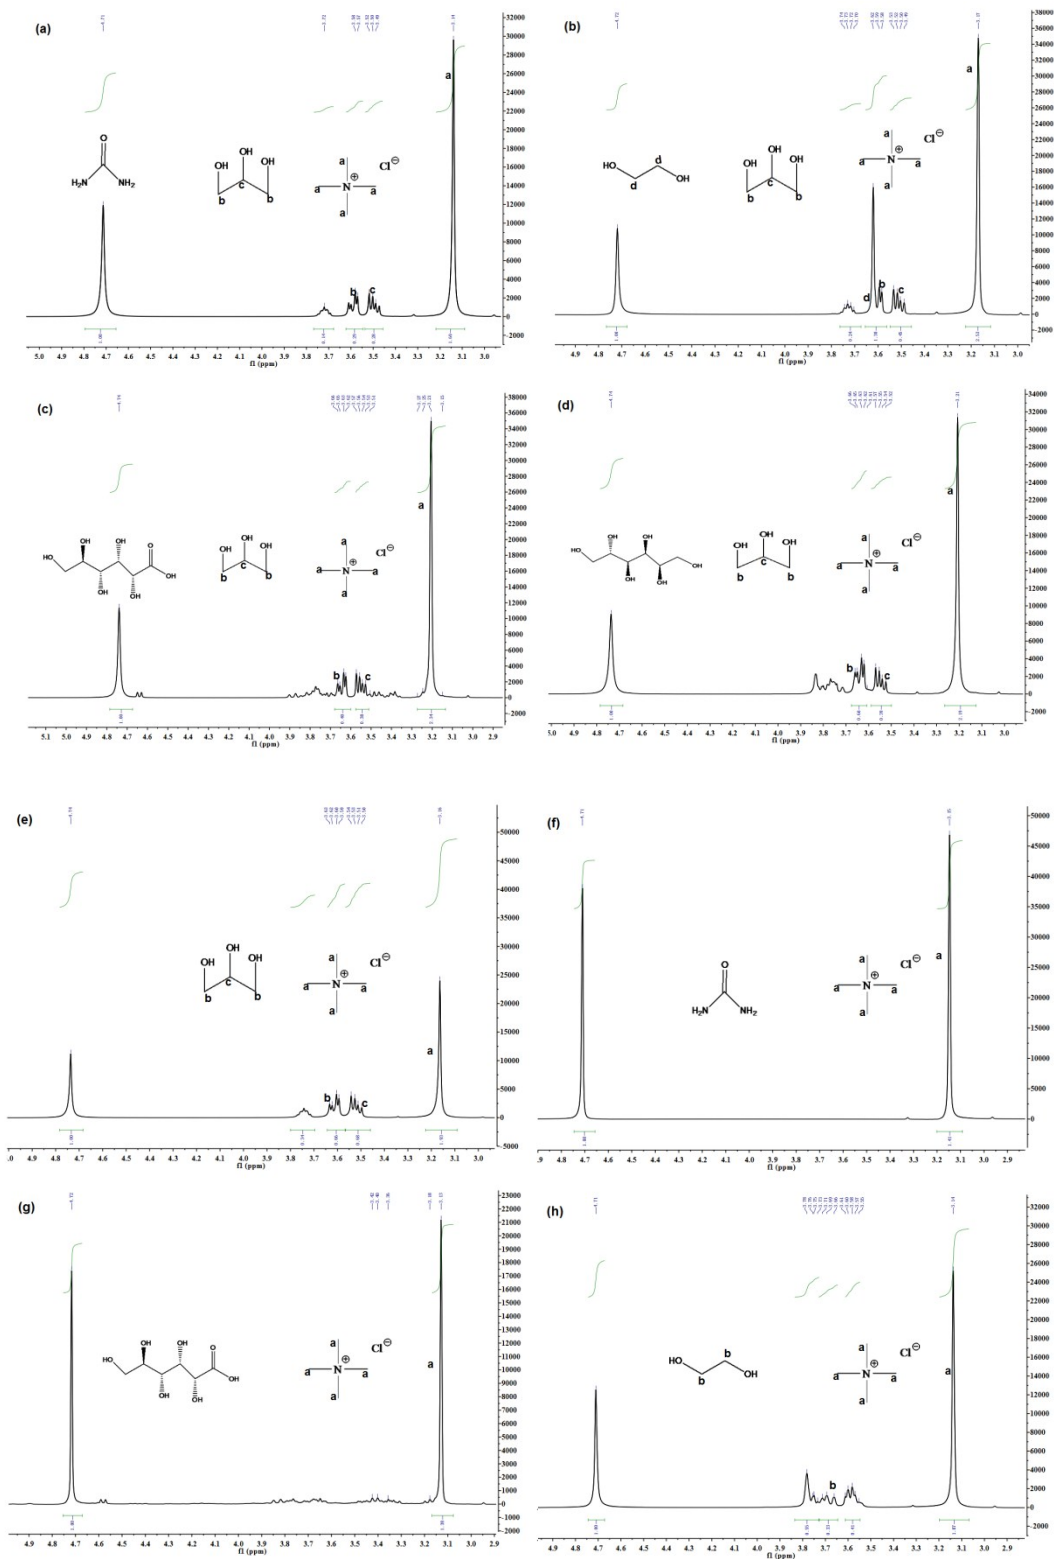

**Fig. S1**  $^1\text{H}$  NMR spectra of DESs solution in  $\text{D}_2\text{O}$ : (a) TMAC-G-U, (b) TMAC-G-EG, (c) TMAC-G-Glu, (d) TMAC-G-Sor, (e) TMAC-G, (f) TMAC-U, (g) TMAC-Glu, (h) TMAC-EG
